# Supplementary material for: Metal-free catalytic conversion of CO2 and glycerol to glycerol carbonate
Source: Royal Society of Chemistry journal article supplement (doi:10.1039/c7gc00260b), 2017-01-01
Supplement: c7gc00260b1.pdf [file c7gc00260b1.pdf]

## Metal-free catalytic conversion of CO<sub>2</sub> and glycerol to glycerol carbonate

Xinluona Su,<sup>a,b,c</sup> Weiwei Lin,<sup>\*a,b</sup> Haiyang Cheng,<sup>a,b</sup> Chao Zhang,<sup>a,b</sup> Ying Wang,<sup>\*d</sup> Xiujuan Yu,<sup>c</sup> Zhijian Wu<sup>d</sup> and Fengyu Zhao<sup>\*a,b</sup>

<sup>a</sup>State Key Laboratory of Electroanalytical Chemistry, Changchun Institute of Applied Chemistry, Chinese Academy of Sciences, Changchun 130022 P.R. China

E-mail: zhaofy@ciac.ac.cn; linwei@ciac.ac.cn; Fax&Tel.: +86-431-8526-2410;

<sup>b</sup>Laboratory of Green Chemistry and Process, Changchun Institute of Applied chemistry, Chinese Academy of Sciences, Changchun 130022 P.R. China

<sup>c</sup>Department of Environmental Science and Engineering, Heilongjiang University, Harbin, 150080, P.R. China

<sup>d</sup>State Key Laboratory of Rare Earth Resource Utilization, Changchun Institute of Applied Chemistry, Chinese Academy of Sciences, Changchun 130022, P.R. China

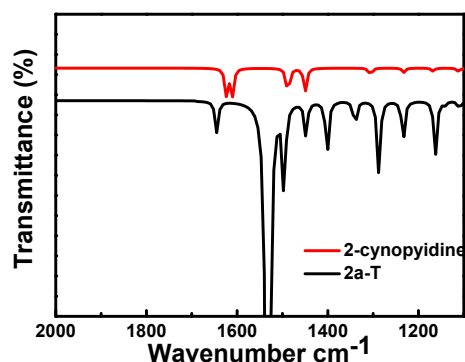

Fig.S1 The calculated IR spectrum of 2a-T (in black) and 2-cyanopyridine (in red).

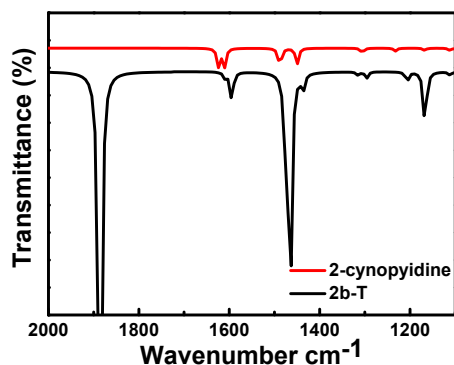

Fig.S2 The calculated IR spectrum of 2b-T (in black) and 2-cyanopyridine (in red).

Table S1 Effect of the solvent on the carbonate synthesis from CO<sub>2</sub> and glycerol

| Entry | solvent    | Conversion(%) | GC Yield (%) |
|-------|------------|---------------|--------------|
| 1     | DMF        | 23.3          | 10.1         |
| 2     | NMP        | 18.4          | 11.6         |
| 3     | acetone    | 22            | 5.6          |
| 4     | Hexane     | 32.1          | 9.2          |
| 5     | no solvent | 31.1          | 11.4         |

Reaction conditions: glycerol 1.15 g, 2-Cyanopyridine/glycerol=2:1, solvent 2 mL, CO<sub>2</sub> 10 MPa, 170 °C, 12 h.

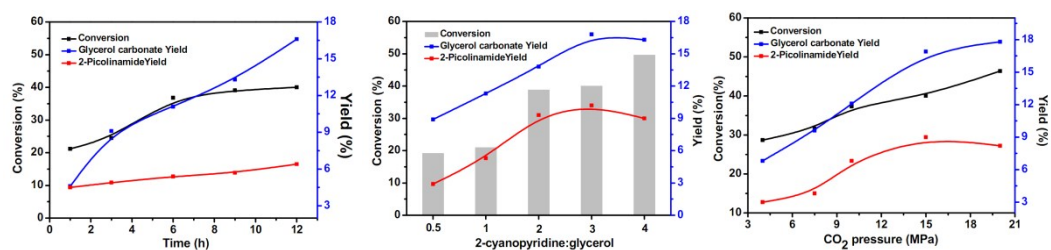

**Fig. S3** Effect of CO<sub>2</sub> pressure, amount of 2-cyanopyridine and reaction time on carbonylation of glycerol with CO<sub>2</sub>.
